# Supplementary material for: The role of fisheries and the environment in driving the decline of elasmobranchs in the northern Adriatic Sea
Source: Oxford University Press journal article supplement (doi:10.1093/icesjms/fst222), 2014-01-12
Supplement: fst222supp.doc [file fst222supp.doc]

**Supplementary material: ICES Journal of Marine Science, 70**

**The role of fisheries and the environment in driving the decline of elasmobranchs in the northern Adriatic Sea**

Alberto Barausse, Vittoria Correale, Aleksia Curkovic, Licia Finotto, Emilio Riginella, Eleonora Visentin, and Carlotta Mazzoldi


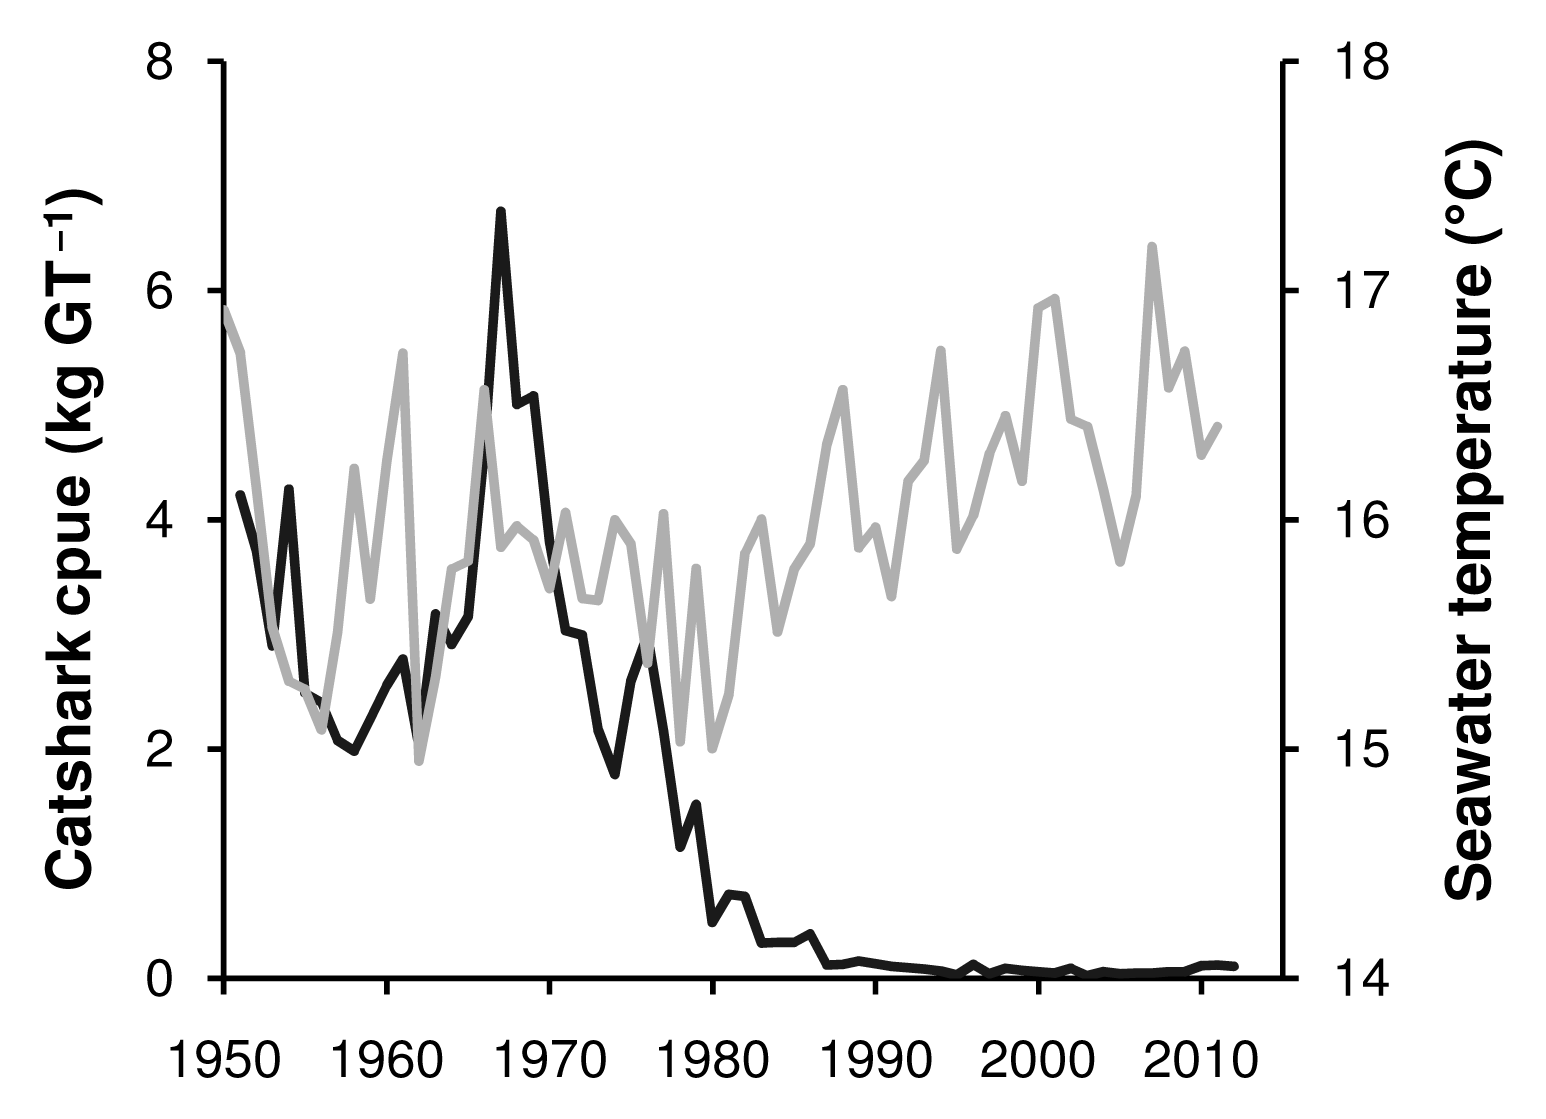


**Figure S1.** Time-series of the annual cpue of catsharks in Chioggia (black line, left axis) and of the annual average seawater temperature in Trieste (grey line, right axis).

**
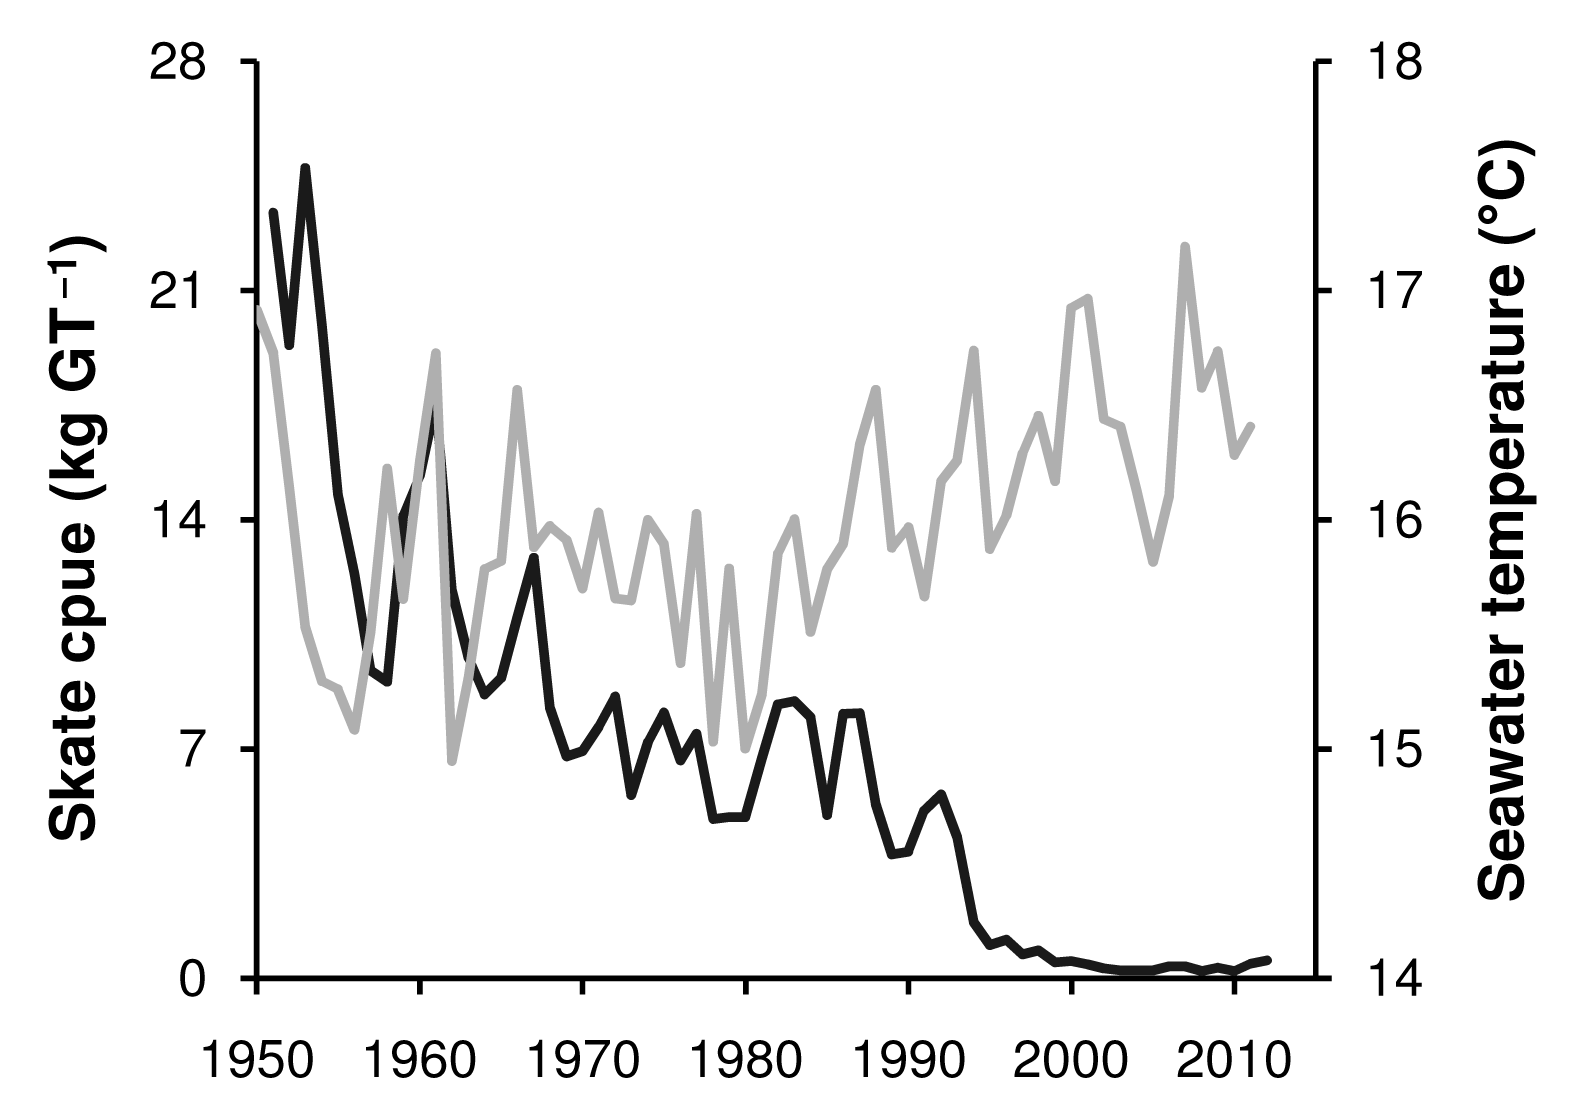
**

**Figure S2.** Time-series of the annual cpue of skates in Chioggia (black line, left axis) and of the annual average seawater temperature in Trieste (grey line, right axis).

**
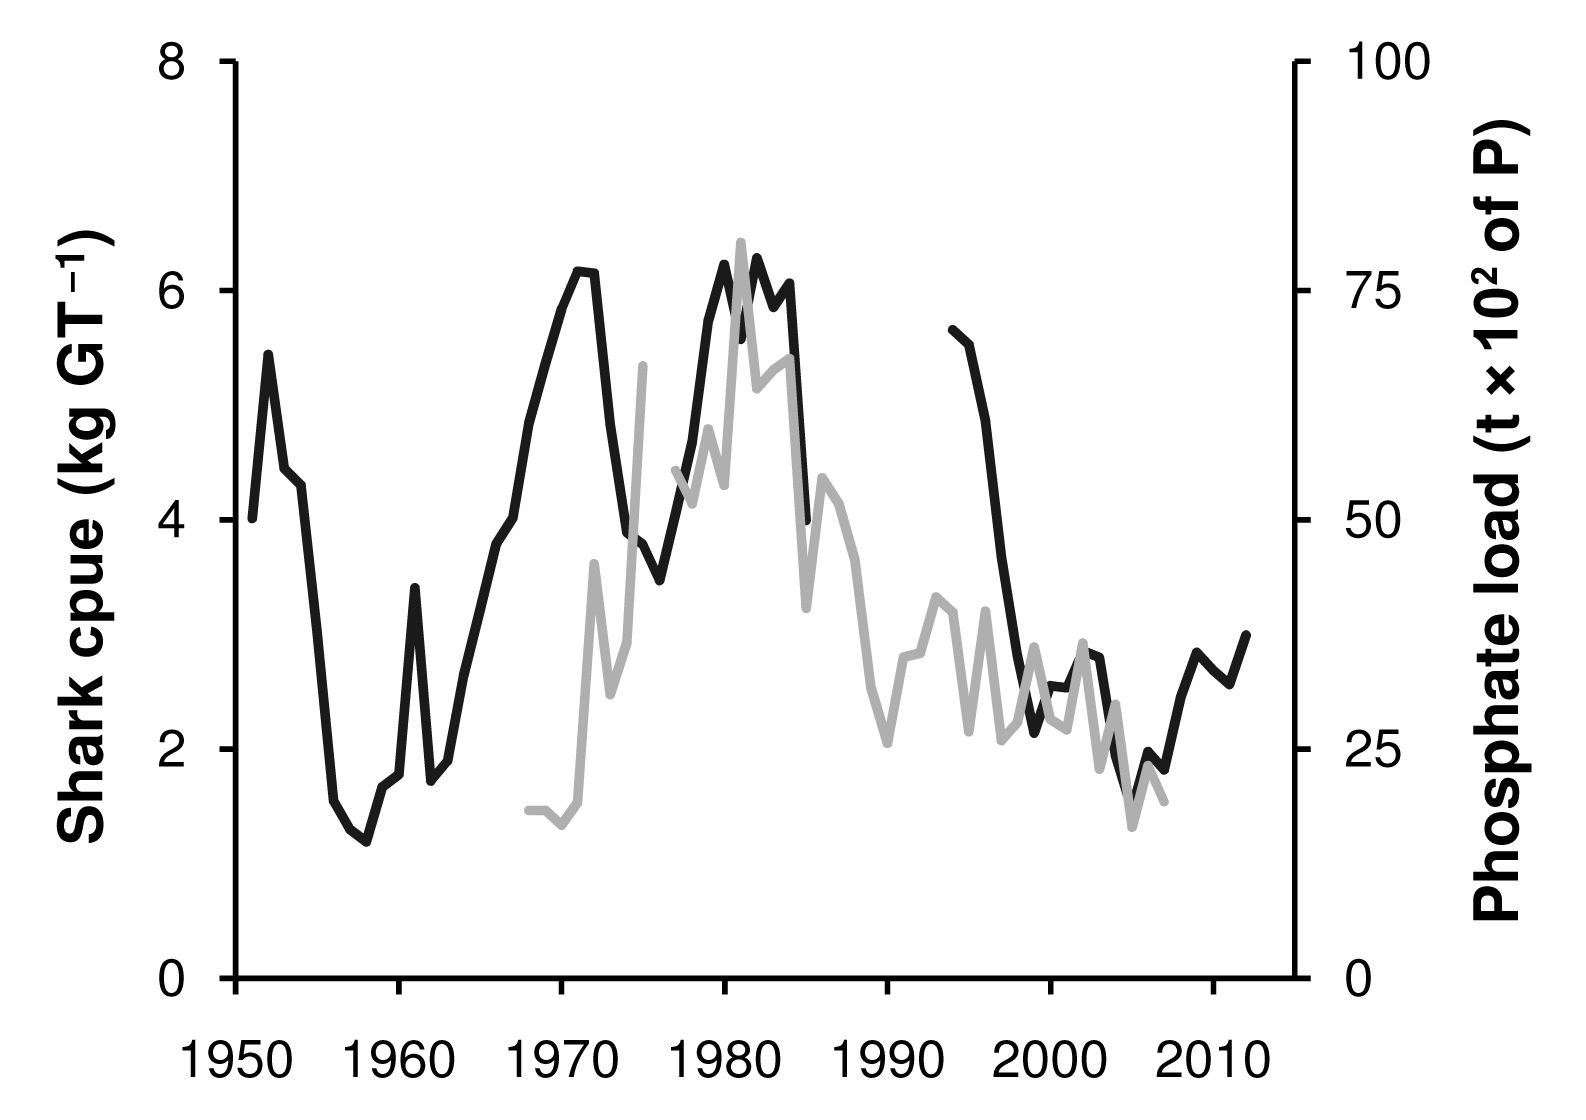
**

**Figure S3.** Time-series of the annual cpue of sharks in Chioggia (black line, left axis) and of the annual phosphate load discharged by the Po River to the northern Adriatic Sea (grey line, right axis).


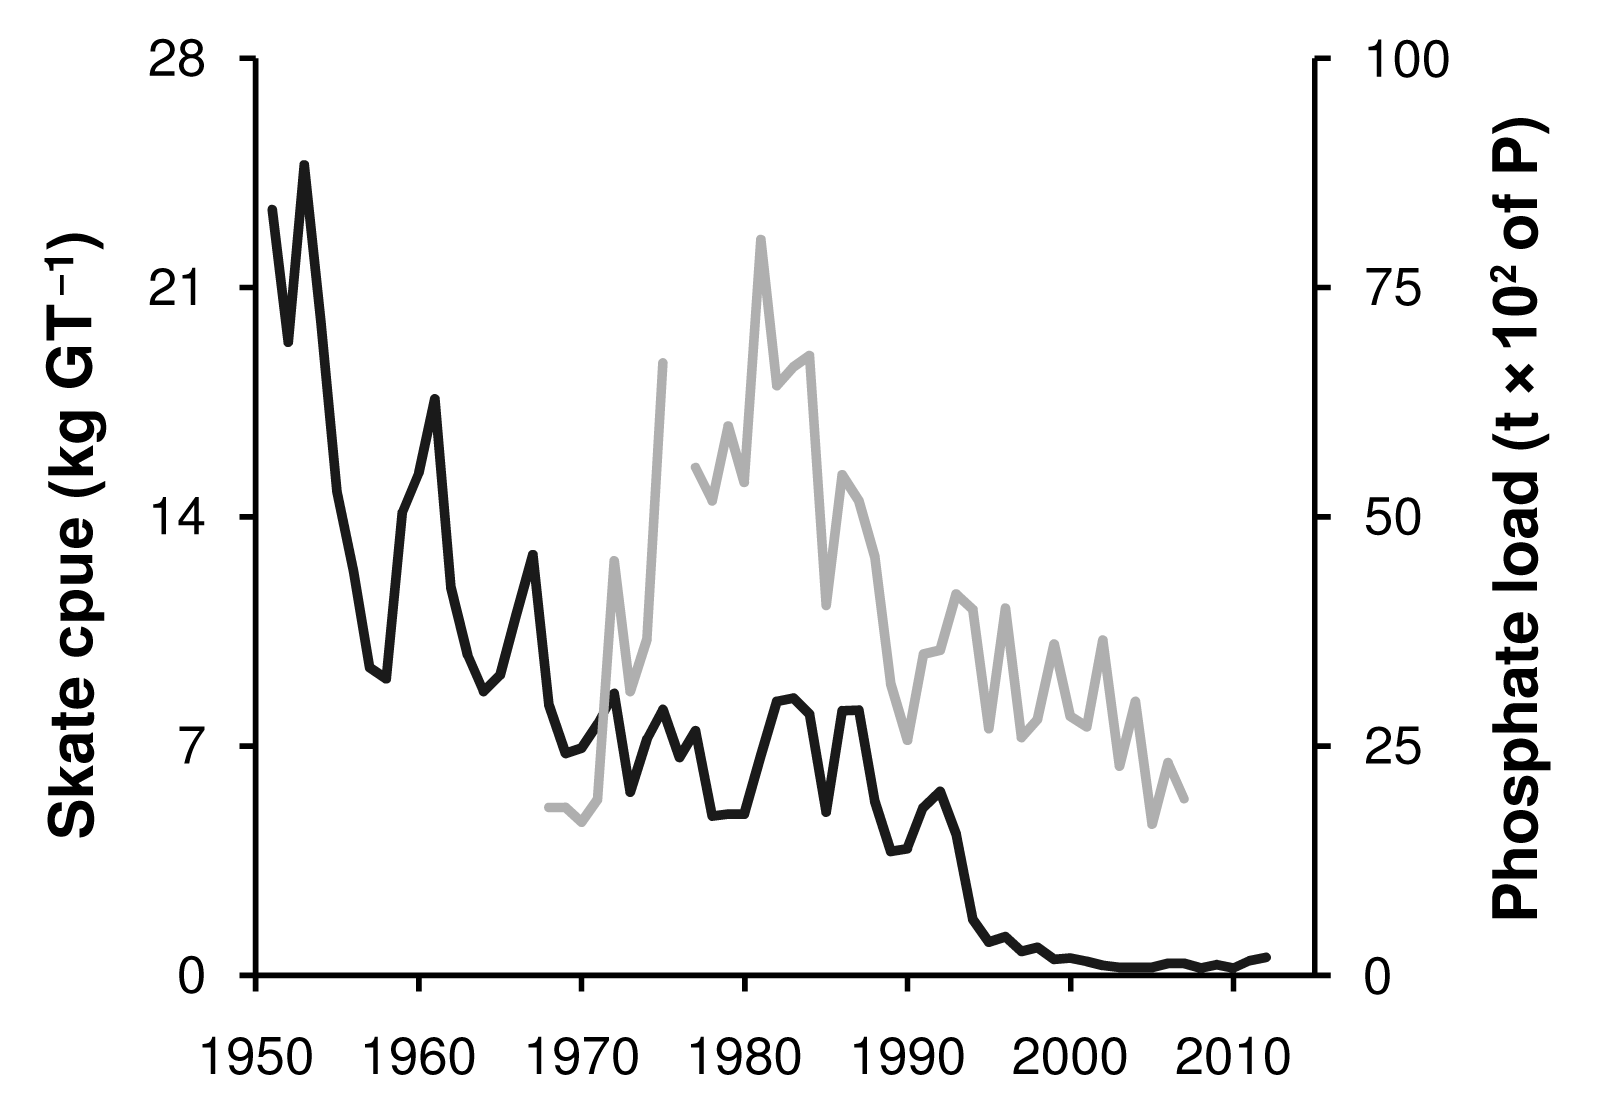


**Figure S4.** Time-series of the annual cpue of skates in Chioggia (black line, left axis) and of the annual phosphate load discharged by the Po River to the northern Adriatic Sea (grey line, right axis).

**
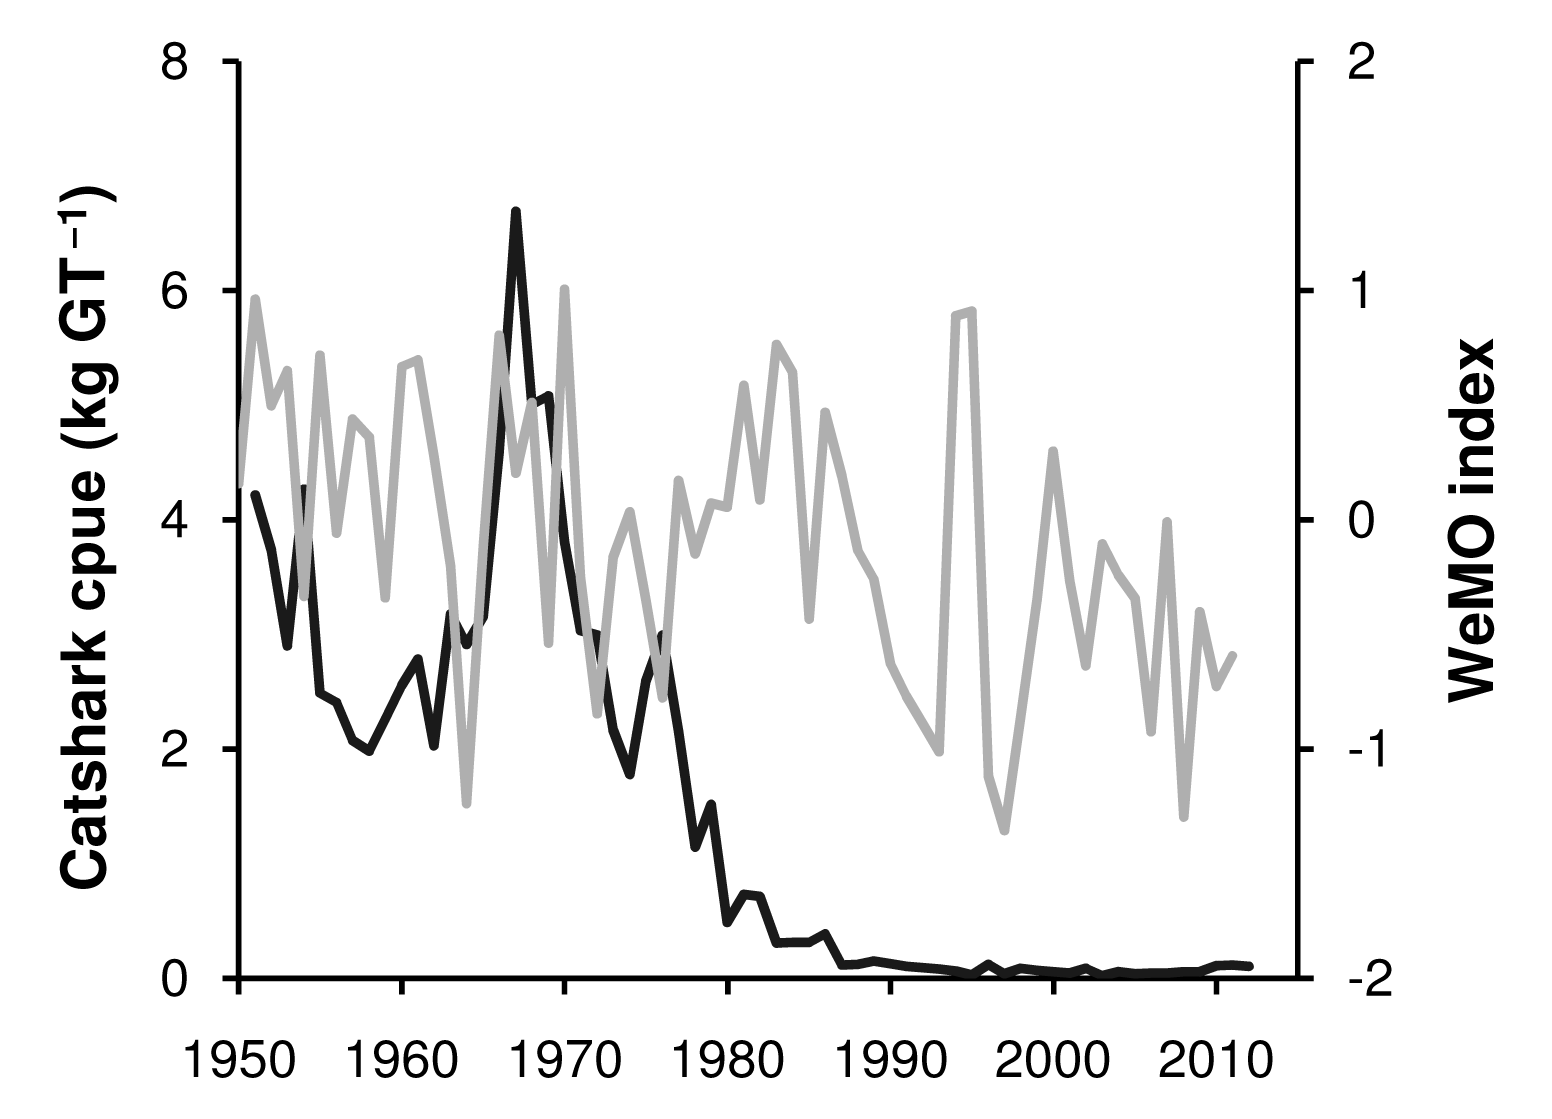
**

**Figure S5.** Time-series of the annual cpue of catsharks in Chioggia (black line, left axis) and of the winter (December–February) Western Mediterranean Oscillation index (grey line, right axis).

**
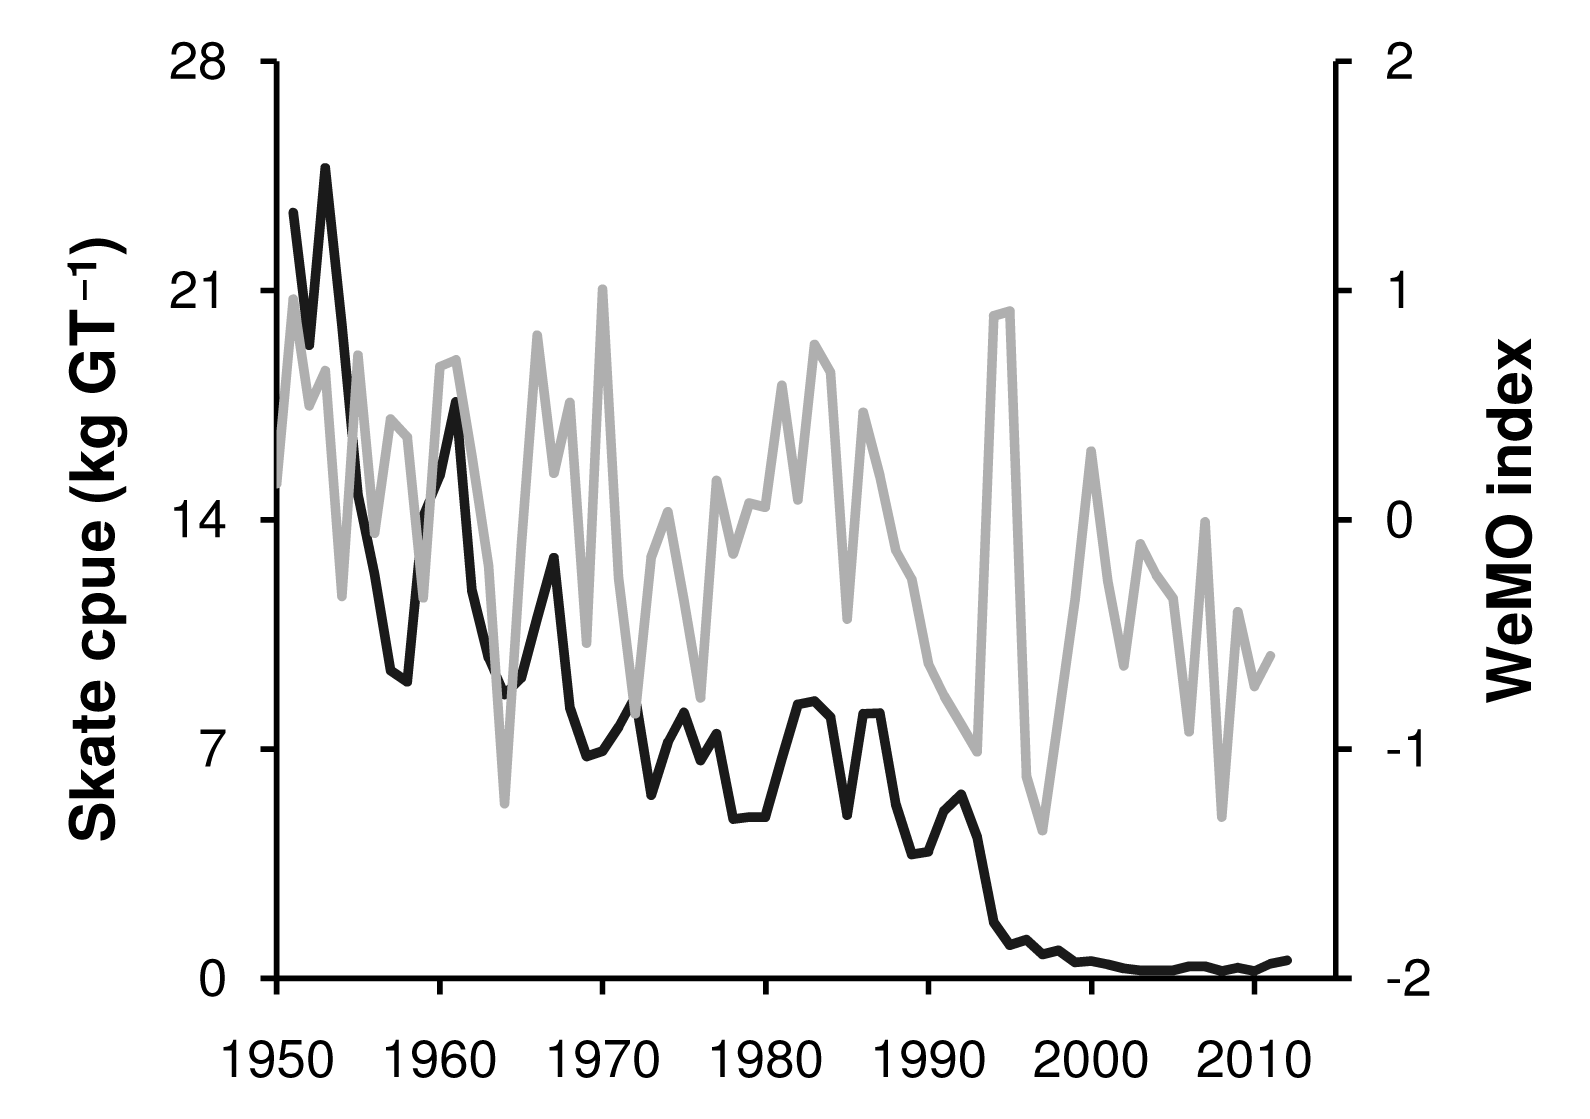
**

**Figure S6.** Time-series of the annual cpue of skates in Chioggia (black line, left axis) and of the winter (December–February) Western Mediterranean Oscillation index (grey line, right axis).
